# Supplementary material for: Phytochemical Composition, Antibacterial Activity, and Antioxidant Properties of the Artocarpus altilis Fruits to Promote Their Consumption in the Comoros Islands as Potential Health-Promoting Food or a Source of Bioactive Molecules for the Food Industry
Source: MDPI journal article supplement (doi:10.3390/foods10092136), 2021-09-09
Supplement: s1 [file s1]

**Table S1.** Chromatographic conditions of each used method.

| Method | Class of Interest                    | Stationary Phase                             | Mobile Phase                                                                                                                                             | Wavelength<br>(nm)    |
|--------|--------------------------------------|----------------------------------------------|----------------------------------------------------------------------------------------------------------------------------------------------------------|-----------------------|
| A      | Cinnamic acid,<br>Flavonols          | KINETEX – C18 column<br>(4.6 × 150 mm, 5 µm) | A: 10 mM KH <sub>2</sub> PO <sub>4</sub> /H <sub>3</sub> PO <sub>4</sub> , pH = 2.8<br>B: CH <sub>3</sub> CN                                             | 330                   |
| B      | Benzoic acids, catechins,<br>tannins | KINETEX – C18 column<br>(4.6 × 150 mm, 5 µm) | A: H <sub>2</sub> O/CH <sub>3</sub> OH/HCOOH (5:95:0.1<br>v/v/v), pH = 2.5<br>B: CH <sub>3</sub> OH/HCOOH (100:0.1 v/v)                                  | 280                   |
| C      | Monoterpenes                         | KINETEX – C18 column<br>(4.6 × 150 mm, 5 µm) | A: H <sub>2</sub> O<br>B: CH <sub>3</sub> CN                                                                                                             | 210, 220,<br>235, 250 |
| D      | Organic acids                        | KINETEX – C18 column<br>(4.6 × 150 mm, 5 µm) | A: 10 mM KH <sub>2</sub> PO <sub>4</sub> /H <sub>3</sub> PO <sub>4</sub> , pH = 2.8<br>B: CH <sub>3</sub> CN                                             | 214                   |
| E      | Vitamins                             | KINETEX – C18 column<br>(4.6 × 150 mm, 5 µm) | A: 5 mM C <sub>16</sub> H <sub>33</sub> N(CH <sub>3</sub> ) <sub>3</sub> Br/50 mM<br>KH <sub>2</sub> PO <sub>4</sub> , pH = 2.5<br>B: CH <sub>3</sub> OH | 261, 348              |

*Elutions conditions:*

Method A, gradient analysis: 5%B to 21%B in 17 min + 21%B in 3 min (2 min conditioning time); flow: 1.5 mL min<sup>-1</sup>

Method B, gradient analysis: 3%B to 85%B in 22 min + 85%B in 1 min (2 min conditioning time); flow: 0.6 mL min<sup>-1</sup>

Method C, gradient analysis: 30%B to 56%B in 15 min + 56%B in 2 min (3 min conditioning); flow: 1.0 mL min<sup>-1</sup>

Method D, gradient analysis: 5%B to 14%B in 10 min + 14%B in 3 min (2 min conditioning time); flow: 0.6 mL min<sup>-1</sup>

Method E, isocratic analysis: ratio of phase A and B: 95:5 in 10 min (5 min conditioning time); flow: 0.9 mL min<sup>-1</sup>
